# Supplementary material for: Comparative Analysis of the Physicochemical and Biological Characteristics of Freeze-Dried PEGylated Cationic Solid Lipid Nanoparticles
Source: MDPI journal article supplement (doi:10.3390/ph16111583), 2023-11-09
Supplement: s1 [file s1]

## Supplementary material

**Table S1.** Measurements of the glass transition temperature (T<sub>g</sub>) of each PEG formulation developed.

| PEG (150 mg) | T <sub>g</sub> (°C) |
|--------------|---------------------|
| Brij S100    | -35.57              |
| Gelucire     | -21.15              |
| Myrj 52      | -25.62              |
| Myrj S100    | -38.18              |

**Table S2.** Correlations and regressions between the physicochemical characteristics (PdI, PSD, and ZP) of suspended cSLNs and the elapsed time (30 days) of each PEG formulation at two temperatures (4 °C and 25 °C) exposed.

| PEG (150 mg) | PdI              |                               |                  |                               | PSD (nm)         |                               |                  |                               | ZP (mV)          |                               |                  |                               |
|--------------|------------------|-------------------------------|------------------|-------------------------------|------------------|-------------------------------|------------------|-------------------------------|------------------|-------------------------------|------------------|-------------------------------|
|              | 4 °C             |                               | 25 °C            |                               | 4 °C             |                               | 25 °C            |                               | 4 °C             |                               | 25 °C            |                               |
| Brij S100    | <i>P</i> = 0.007 | <i>R</i> <sup>2</sup> = 0.731 | <i>P</i> < 0.001 | <i>R</i> <sup>2</sup> = 0.888 | <i>P</i> = 0.013 | <i>R</i> <sup>2</sup> = 0.671 | <i>P</i> = 0.008 | <i>R</i> <sup>2</sup> = 0.719 | <i>P</i> = 0.266 | <i>R</i> <sup>2</sup> = 0.200 | <i>P</i> = 0.520 | <i>R</i> <sup>2</sup> = 0.072 |
| Gelucire     | <i>P</i> = 0.509 | <i>R</i> <sup>2</sup> = 0.074 | <i>P</i> = 0.001 | <i>R</i> <sup>2</sup> = 0.864 | <i>P</i> = 0.023 | <i>R</i> <sup>2</sup> = 0.604 | <i>P</i> = 0.071 | <i>R</i> <sup>2</sup> = 0.450 | <i>P</i> = 0.030 | <i>R</i> <sup>2</sup> = 0.572 | <i>P</i> = 0.160 | <i>R</i> <sup>2</sup> = 0.300 |
| Myrj 52      | <i>P</i> = 0.688 | <i>R</i> <sup>2</sup> = 0.029 | <i>P</i> = 0.005 | <i>R</i> <sup>2</sup> = 0.755 | <i>P</i> = 0.032 | <i>R</i> <sup>2</sup> = 0.561 | <i>P</i> = 0.034 | <i>R</i> <sup>2</sup> = 0.556 | <i>P</i> = 0.007 | <i>R</i> <sup>2</sup> = 0.728 | <i>P</i> = 0.067 | <i>R</i> <sup>2</sup> = 0.453 |
| Myrj S100    | <i>P</i> = 0.653 | <i>R</i> <sup>2</sup> = 0.036 | <i>P</i> = 0.022 | <i>R</i> <sup>2</sup> = 0.609 | <i>P</i> = 0.040 | <i>R</i> <sup>2</sup> = 0.533 | <i>P</i> = 0.001 | <i>R</i> <sup>2</sup> = 0.844 | <i>P</i> < 0.001 | <i>R</i> <sup>2</sup> = 0.952 | <i>P</i> = 0.134 | <i>R</i> <sup>2</sup> = 0.334 |

**Table S3.** Correlations and regressions between the physicochemical characteristics (PdI, PSD, and ZP) of lyophilized cSLNs and the elapsed time (one year) of each PEG formulation at two temperatures (4 °C and 25 °C) exposed.

| PEG (150 mg) | PdI              |                               |                  |                               | PSD (nm)         |                               |                  |                               | ZP (mV)          |                               |                  |                               |
|--------------|------------------|-------------------------------|------------------|-------------------------------|------------------|-------------------------------|------------------|-------------------------------|------------------|-------------------------------|------------------|-------------------------------|
|              | 4 °C             |                               | 25 °C            |                               | 4 °C             |                               | 25 °C            |                               | 4 °C             |                               | 25 °C            |                               |
| Brij S100    | <i>P</i> = 0.652 | <i>R</i> <sup>2</sup> = 0.056 | <i>P</i> = 0.104 | <i>R</i> <sup>2</sup> = 0.523 | <i>P</i> = 0.024 | <i>R</i> <sup>2</sup> = 0.758 | <i>P</i> = 0.088 | <i>R</i> <sup>2</sup> = 0.559 | <i>P</i> = 0.039 | <i>R</i> <sup>2</sup> = 0.695 | <i>P</i> = 0.023 | <i>R</i> <sup>2</sup> = 0.763 |
| DSPE         | <i>P</i> = 0.607 | <i>R</i> <sup>2</sup> = 0.072 | <i>P</i> = 0.752 | <i>R</i> <sup>2</sup> = 0.028 | <i>P</i> = 0.118 | <i>R</i> <sup>2</sup> = 0.496 | <i>P</i> = 0.303 | <i>R</i> <sup>2</sup> = 0.258 | <i>P</i> = 0.469 | <i>R</i> <sup>2</sup> = 0.138 | <i>P</i> = 0.774 | <i>R</i> <sup>2</sup> = 0.023 |
| Gelucire     | <i>P</i> = 0.040 | <i>R</i> <sup>2</sup> = 0.691 | <i>P</i> = 0.323 | <i>R</i> <sup>2</sup> = 0.241 | <i>P</i> = 0.080 | <i>R</i> <sup>2</sup> = 0.576 | <i>P</i> = 0.867 | <i>R</i> <sup>2</sup> = 0.008 | <i>P</i> = 0.655 | <i>R</i> <sup>2</sup> = 0.055 | <i>P</i> = 0.238 | <i>R</i> <sup>2</sup> = 0.325 |
| Myrj 52      | <i>P</i> = 0.013 | <i>R</i> <sup>2</sup> = 0.819 | <i>P</i> = 0.139 | <i>R</i> <sup>2</sup> = 0.460 | <i>P</i> = 0.916 | <i>R</i> <sup>2</sup> = 0.003 | <i>P</i> = 0.286 | <i>R</i> <sup>2</sup> = 0.275 | <i>P</i> = 0.628 | <i>R</i> <sup>2</sup> = 0.064 | <i>P</i> = 0.694 | <i>R</i> <sup>2</sup> = 0.043 |
| Myrj S100    | <i>P</i> = 0.450 | <i>R</i> <sup>2</sup> = 0.149 | <i>P</i> = 0.173 | <i>R</i> <sup>2</sup> = 0.406 | <i>P</i> = 0.065 | <i>R</i> <sup>2</sup> = 0.615 | <i>P</i> = 0.159 | <i>R</i> <sup>2</sup> = 0.428 | <i>P</i> = 0.005 | <i>R</i> <sup>2</sup> = 0.374 | <i>P</i> = 0.922 | <i>R</i> <sup>2</sup> = 0.003 |

exo

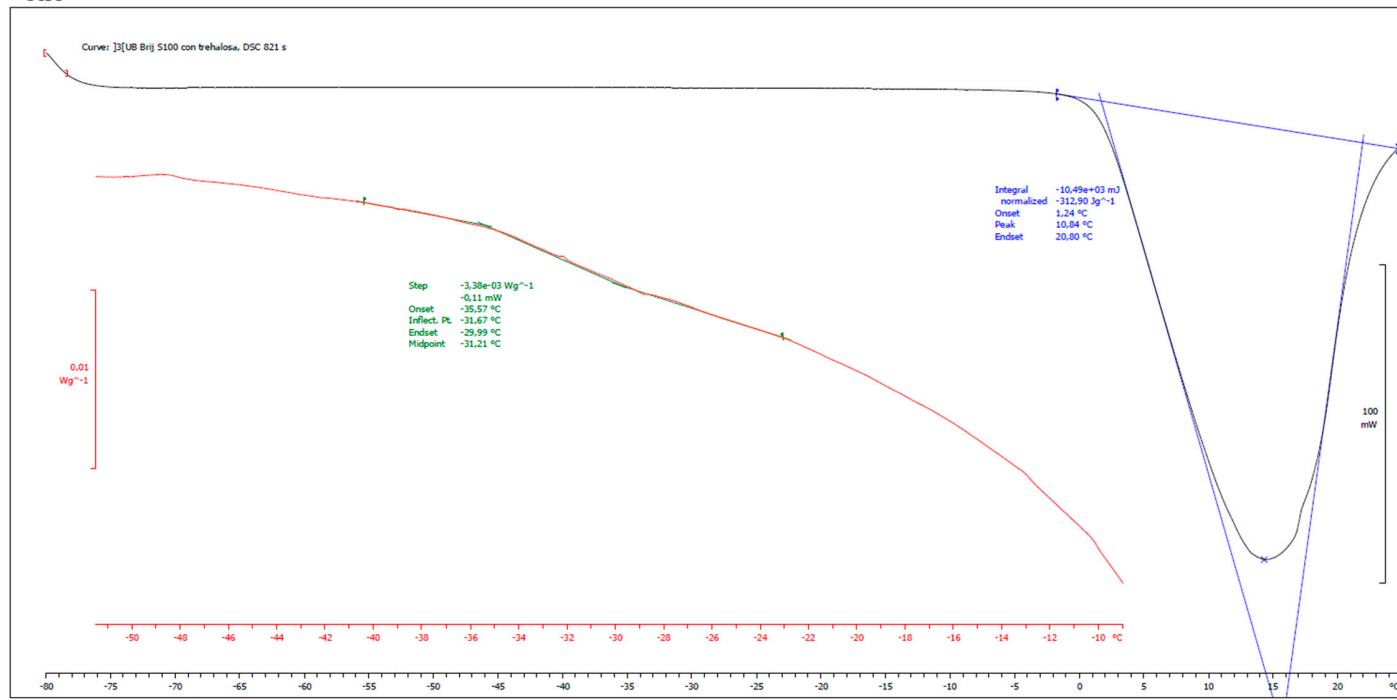

A -CSIC: IQAC

STAR<sup>®</sup> SW 10.00

exo

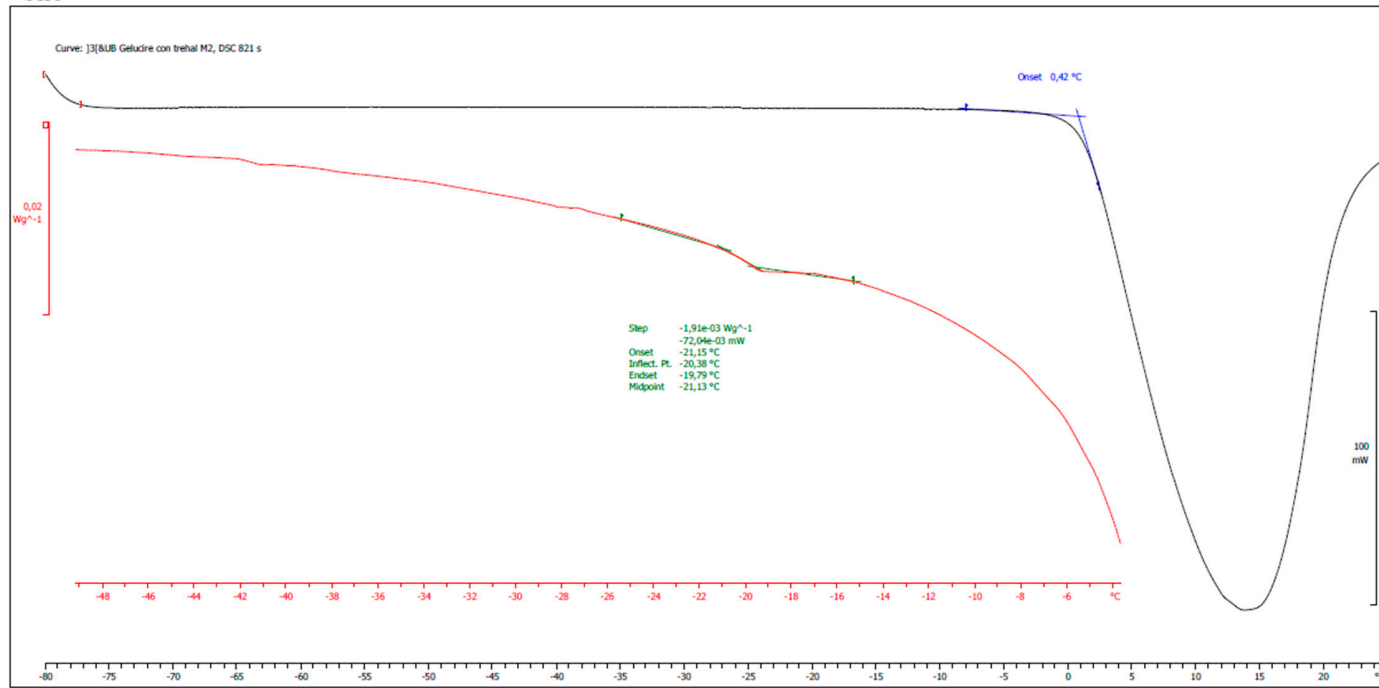

B IQAC-CSIC: IQAC

STAR<sup>®</sup> SW 10.00

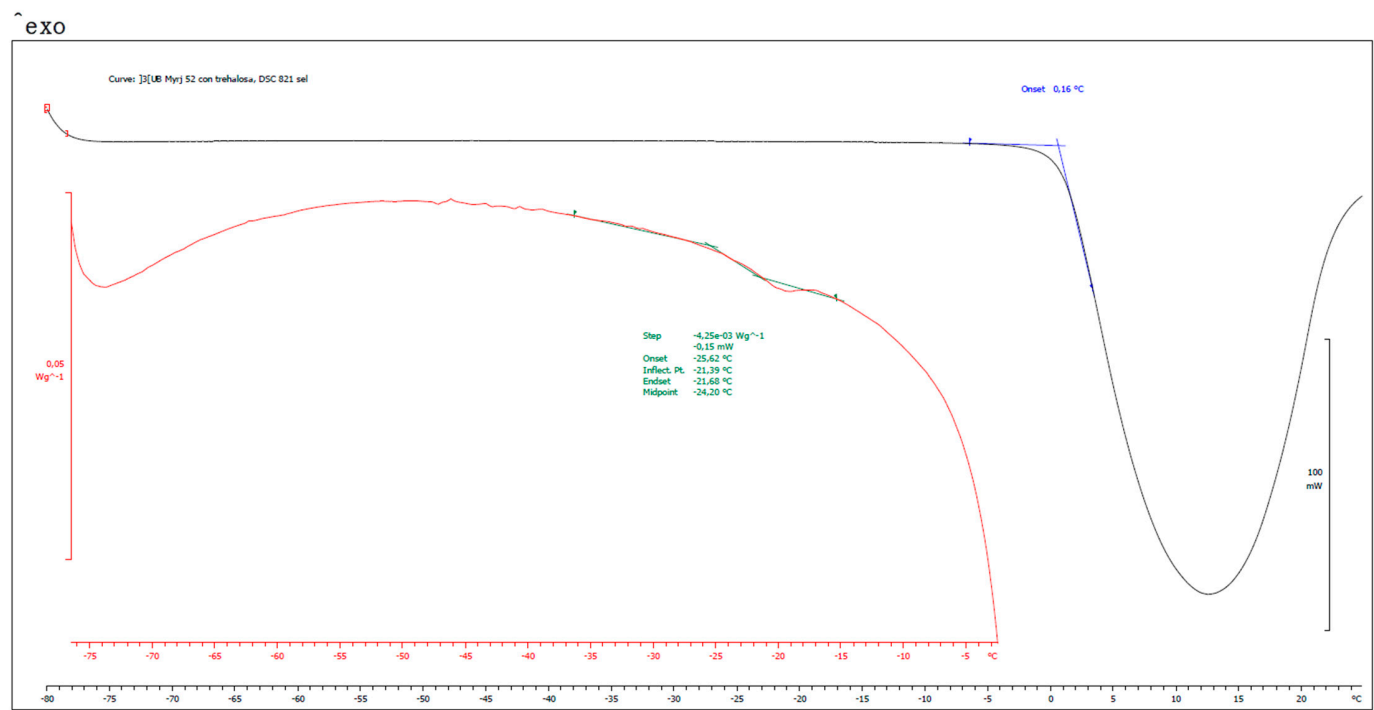

C IQAC-CSIC: IQAC

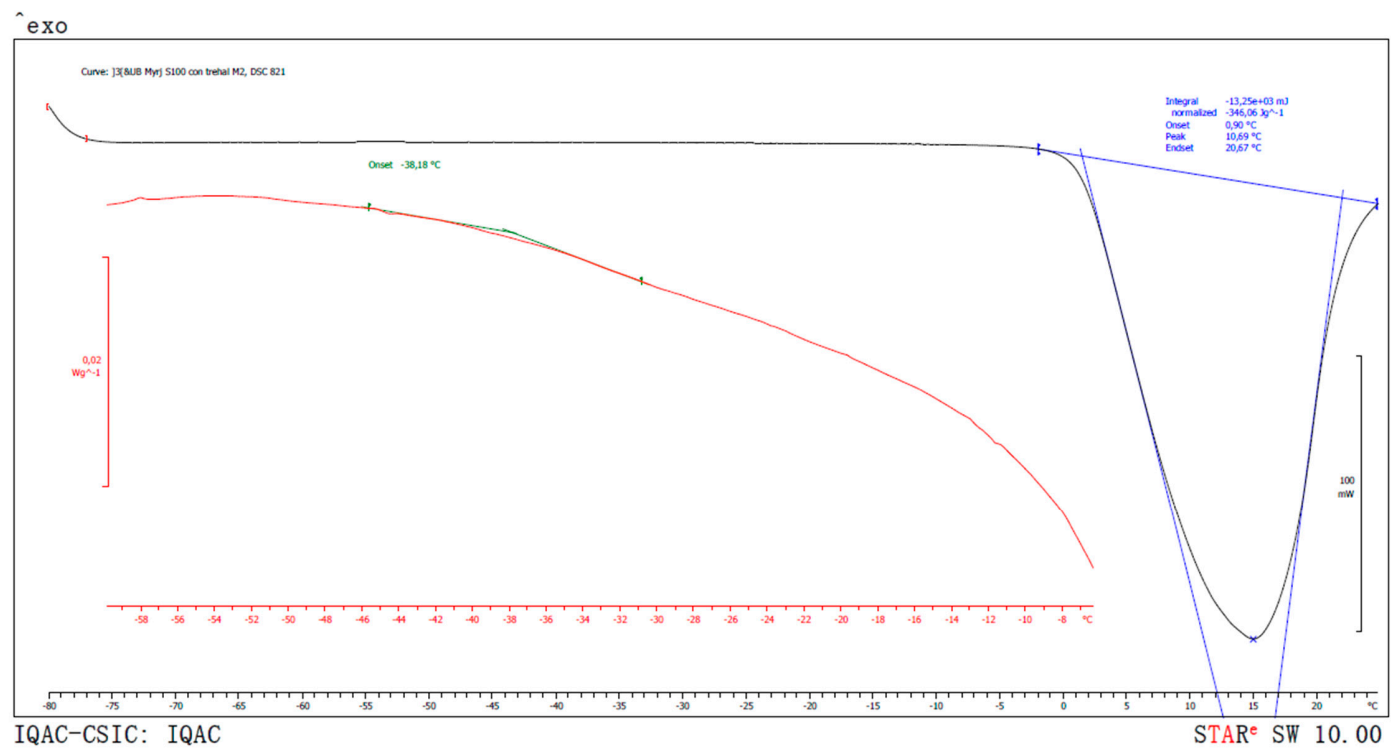

D IQAC-CSIC: IQAC

**Figure S1:** DSC analysis of the four PEG-cSLNs suspended in a solution with 5% of trehalose. Brij S100 (A), Gelucire (B), Myrj 52 (C), and Myrj S100 (D).
